# Supplementary material for: Long history paddy rice mapping across Northeast China with deep learning and annualresult enhancement method
Source: Copernicus journal article supplement (doi:10.5194/essd-17-6851-2025), 2025-12-05
Supplement: Supplementary file 1 [file Table S1.docx]

| Scene ID | Year | Train/Test |
| --- | --- | --- |
| LT05_L1TP_120031_19890809_20200916_02_T1 | 1989 | Test |
| LT05_L1TP_114027_19890815_20200916_02_T1 | 1989 | Test |
| LT05_L1TP_118028_19920920_20200914_02_T1 | 1992 | Test |
| LT05_L1TP_115027_19930902_20200913_02_T1 | 1993 | Test |
| LT05_L1TP_120028_19940924_20200913_02_T1 | 1994 | Test |
| LT05_L1TP_120031_19970714_20200910_02_T1 | 1997 | Test |
| LT05_L1TP_116028_20000928_20200906_02_T1 | 2000 | Test |
| LT05_L1TP_115027_20000921_20200906_02_T1 | 2000 | Test |
| LT05_L1TP_119030_20030910_20200904_02_T1 | 2003 | Test |
| LT05_L1TP_120031_20040818_20200903_02_T1 | 2004 | Test |
| LT05_L1TP_118028_20040921_20200903_02_T1 | 2004 | Test |
| LT05_L1TP_114027_20040925_20200903_02_T1 | 2004 | Test |
| LT05_L1TP_117029_20060920_20200831_02_T1 | 2006 | Test |
| LT05_L1TP_120028_20080930_20200829_02_T1 | 2008 | Test |
| LT05_L1TP_119030_20100913_20200823_02_T1 | 2010 | Test |
| LT05_L1TP_117029_20100915_20200823_02_T1 | 2010 | Test |
| LT05_L1TP_115027_20110904_20200820_02_T1 | 2011 | Test |
| LC08_L1TP_120030_20130928_20200913_02_T1 | 2013 | Test |
| LC08_L1TP_116030_20140919_20200910_02_T1 | 2014 | Test |
| LC08_L1TP_114028_20140921_20170419_01_T1 | 2014 | Test |
| LC08_L1TP_118029_20150920_20200908_02_T1 | 2015 | Test |
| LC08_L1TP_120029_20160920_20200906_02_T1 | 2016 | Test |
| LC08_L1TP_120028_20160920_20180205_01_T1 | 2016 | Test |
| LC08_L1TP_120028_20160819_20170322_01_T1 | 2016 | Test |
| LC08_L1TP_120027_20160920_20180205_01_T1 | 2016 | Test |
| LC08_L1TP_120027_20160819_20170322_01_T1 | 2016 | Test |
| LC08_L1TP_120026_20160920_20180205_01_T1 | 2016 | Test |
| LC08_L1TP_116028_20160823_20170322_01_T1 | 2016 | Test |
| LC08_L1TP_116026_20160823_20170322_01_T1 | 2016 | Test |
| LC08_L1TP_120032_20170923_20200903_02_T1 | 2017 | Test |
| LC08_L1TP_118031_20170824_20200903_02_T1 | 2017 | Test |
| LC08_L1TP_118030_20170925_20200903_02_T1 | 2017 | Test |
| LC08_L1TP_118032_20180811_20200831_02_T1 | 2018 | Test |
| LC08_L1TP_116026_20180930_20181010_01_T1 | 2018 | Test |
| LC08_L1TP_118028_20200816_20200822_01_T1 | 2020 | Test |
| LC08_L1TP_118027_20200816_20200822_01_T1 | 2020 | Test |
| LC08_L1TP_118026_20200816_20200822_01_T1 | 2020 | Test |
| LC08_L1TP_116029_20200717_20200722_01_T1 | 2020 | Test |
| LC08_L1TP_116027_20200802_20200807_01_T1 | 2020 | Test |
| LC09_L1TP_122031_20220810_20230403_02_T1 | 2022 | Test |
| LC09_L1TP_120031_20220929_20220929_02_T1 | 2022 | Test |
| LC09_L1TP_114027_20220919_20220919_02_T1 | 2022 | Test |
| LC08_L1TP_120031_20220921_20220929_02_T1 | 2022 | Test |
| LC08_L1TP_114027_20220927_20221004_02_T1 | 2022 | Test |
| LT05_L1TP_117029_19850910_20200918_02_T1 | 1985 | Train |
| LT05_L1TP_117029_19850606_20200918_02_T1 | 1985 | Train |
| LT05_L1TP_119030_19880831_20200917_02_T1 | 1988 | Train |
| LT05_L1TP_119030_19880612_20200917_02_T1 | 1988 | Train |
| LT05_L1TP_120031_19890622_20200916_02_T1 | 1989 | Train |
| LT05_L1TP_120031_19890521_20200916_02_T1 | 1989 | Train |
| LT05_L1TP_114027_19890612_20200916_02_T1 | 1989 | Train |
| LT05_L1TP_118028_19920904_20200914_02_T1 | 1992 | Train |
| LT05_L1TP_118028_19920819_20200914_02_T1 | 1992 | Train |
| LT05_L1TP_118028_19920616_20200914_02_T1 | 1992 | Train |
| LT05_L1TP_115027_19930630_20200914_02_T1 | 1993 | Train |
| LT05_L1TP_115027_19930529_20200914_02_T1 | 1993 | Train |
| LT05_L1TP_120028_19940908_20200913_02_T1 | 1994 | Train |
| LT05_L1TP_120028_19940807_20200913_02_T1 | 1994 | Train |
| LT05_L1TP_120028_19940604_20200913_02_T1 | 1994 | Train |
| LT05_L1TP_120031_19970628_20200910_02_T1 | 1997 | Train |
| LT05_L1TP_120031_19970612_20200910_02_T1 | 1997 | Train |
| LT05_L1TP_116028_20000912_20200906_02_T1 | 2000 | Train |
| LT05_L1TP_116028_20000811_20200906_02_T1 | 2000 | Train |
| LT05_L1TP_116028_20000608_20200906_02_T1 | 2000 | Train |
| LT05_L1TP_115027_20000804_20200907_02_T1 | 2000 | Train |
| LT05_L1TP_115027_20000703_20200907_02_T1 | 2000 | Train |
| LT05_L1TP_115027_20000617_20200907_02_T1 | 2000 | Train |
| LT05_L1TP_115027_20000601_20200907_02_T1 | 2000 | Train |
| LT05_L1TP_119030_20030825_20200904_02_T1 | 2003 | Train |
| LT05_L1TP_119030_20030809_20200904_02_T1 | 2003 | Train |
| LT05_L1TP_119030_20030606_20200904_02_T1 | 2003 | Train |
| LT05_L1TP_120031_20040615_20200903_02_T1 | 2004 | Train |
| LT05_L1TP_118028_20040820_20200903_02_T1 | 2004 | Train |
| LT05_L1TP_118028_20040601_20200903_02_T1 | 2004 | Train |
| LT05_L1TP_114027_20040909_20200903_02_T1 | 2004 | Train |
| LT05_L1TP_114027_20040824_20200903_02_T1 | 2004 | Train |
| LT05_L1TP_114027_20040605_20200903_02_T1 | 2004 | Train |
| LT05_L1TP_117029_20060819_20200831_02_T1 | 2006 | Train |
| LT05_L1TP_117029_20060702_20200831_02_T1 | 2006 | Train |
| LT05_L1TP_117029_20060531_20200901_02_T1 | 2006 | Train |
| LT05_L1TP_120028_20080829_20200829_02_T1 | 2008 | Train |
| LT05_L1TP_120028_20080813_20200829_02_T1 | 2008 | Train |
| LT05_L1TP_120028_20080626_20200829_02_T1 | 2008 | Train |
| LT05_L1TP_120028_20080610_20200829_02_T1 | 2008 | Train |
| LT05_L1TP_119030_20100625_20200823_02_T1 | 2010 | Train |
| LT05_L1TP_119030_20100609_20200824_02_T1 | 2010 | Train |
| LT05_L1TP_117029_20100729_20200823_02_T1 | 2010 | Train |
| LT05_L1TP_117029_20100611_20200824_02_T1 | 2010 | Train |
| LT05_L1TP_115027_20110718_20200822_02_T1 | 2011 | Train |
| LT05_L1TP_115027_20110616_20200822_02_T1 | 2011 | Train |
| LC08_L1TP_120030_20130912_20200913_02_T1 | 2013 | Train |
| LC08_L1TP_120030_20130624_20200912_02_T1 | 2013 | Train |
| LC08_L1TP_120030_20130608_20200912_02_T1 | 2013 | Train |
| LC08_L1TP_116030_20140701_20200911_02_T1 | 2014 | Train |
| LC08_L1TP_116030_20140530_20200911_02_T1 | 2014 | Train |
| LC08_L1TP_114028_20140820_20170420_01_T1 | 2014 | Train |
| LC08_L1TP_114028_20140703_20170421_01_T1 | 2014 | Train |
| LC08_L1TP_114028_20140601_20170422_01_T1 | 2014 | Train |
| LC08_L1TP_118029_20150803_20200908_02_T1 | 2015 | Train |
| LC08_L1TP_118029_20150718_20200908_02_T1 | 2015 | Train |
| LC08_L1TP_118029_20150616_20170407_01_T1 | 2015 | Train |
| LC08_L1TP_122030_20160817_20200906_02_T1 | 2016 | Train |
| LC08_L1TP_122030_20160529_20200906_02_T1 | 2016 | Train |
| LC08_L1TP_120029_20160803_20200906_02_T1 | 2016 | Train |
| LC08_L1TP_120029_20160531_20200906_02_T1 | 2016 | Train |
| LC08_L1TP_120028_20160803_20180205_01_T1 | 2016 | Train |
| LC08_L1TP_120028_20160718_20170323_01_T1 | 2016 | Train |
| LC08_L1TP_120028_20160702_20170323_01_T1 | 2016 | Train |
| LC08_L1TP_120028_20160616_20170323_01_T1 | 2016 | Train |
| LC08_L1TP_120028_20160531_20180205_01_T1 | 2016 | Train |
| LC08_L1TP_120027_20160803_20180205_01_T1 | 2016 | Train |
| LC08_L1TP_120027_20160718_20170323_01_T1 | 2016 | Train |
| LC08_L1TP_120027_20160702_20170323_01_T1 | 2016 | Train |
| LC08_L1TP_120027_20160616_20170323_01_T1 | 2016 | Train |
| LC08_L1TP_120027_20160531_20180205_01_T1 | 2016 | Train |
| LC08_L1TP_120026_20160819_20170322_01_T1 | 2016 | Train |
| LC08_L1TP_120026_20160718_20170323_01_T1 | 2016 | Train |
| LC08_L1TP_120026_20160531_20180205_01_T1 | 2016 | Train |
| LC08_L1TP_116028_20160807_20170322_01_T1 | 2016 | Train |
| LC08_L1TP_116028_20160706_20170323_01_T1 | 2016 | Train |
| LC08_L1TP_116028_20160604_20170324_01_T1 | 2016 | Train |
| LC08_L1TP_116026_20160706_20170323_01_T1 | 2016 | Train |
| LC08_L1TP_116026_20160604_20170324_01_T1 | 2016 | Train |
| LC08_L1TP_120032_20170907_20200903_02_T1 | 2017 | Train |
| LC08_L1TP_120032_20170603_20200903_02_T1 | 2017 | Train |
| LC08_L1TP_118031_20170605_20200903_02_T1 | 2017 | Train |
| LC08_L1TP_118030_20170824_20200903_02_T1 | 2017 | Train |
| LC08_L1TP_118030_20170605_20200903_02_T1 | 2017 | Train |
| LC08_L1TP_118032_20180624_20200831_02_T1 | 2018 | Train |
| LC08_L1TP_118032_20180523_20200901_02_T1 | 2018 | Train |
| LC08_L1TP_116026_20180914_20180928_01_T1 | 2018 | Train |
| LC08_L1TP_118028_20200715_20200722_01_T1 | 2020 | Train |
| LC08_L1TP_118028_20200528_20200608_01_T1 | 2020 | Train |
| LC08_L1TP_118027_20200715_20200722_01_T1 | 2020 | Train |
| LC08_L1TP_118027_20200528_20200608_01_T1 | 2020 | Train |
| LC08_L1TP_118026_20200715_20200722_01_T1 | 2020 | Train |
| LC08_L1TP_118026_20200613_20200625_01_T1 | 2020 | Train |
| LC08_L1TP_116029_20200701_20200708_01_T1 | 2020 | Train |
| LC08_L1TP_116029_20200530_20200608_01_T1 | 2020 | Train |
| LC08_L1TP_116027_20200717_20200722_01_T1 | 2020 | Train |
| LC08_L1TP_116027_20200701_20200708_01_T1 | 2020 | Train |
| LC08_L1TP_116027_20200530_20200608_01_T1 | 2020 | Train |
| LC09_L1TP_122031_20220522_20230415_02_T1 | 2022 | Train |
| LC09_L1TP_120031_20220929_20220929_02_T1 | 2022 | Train |
| LC09_L1TP_114027_20220903_20220903_02_T1 | 2022 | Train |
| LC09_L1TP_114027_20220818_20220818_02_T1 | 2022 | Train |
| LC09_L1TP_114027_20220802_20220802_02_T1 | 2022 | Train |
| LC09_L1TP_114027_20220615_20220615_02_T1 | 2022 | Train |
| LC08_L1TP_120031_20220820_20220923_02_T1 | 2022 | Train |
| LC08_L1TP_120031_20220617_20220629_02_T1 | 2022 | Train |
| LC08_L1TP_120031_20220601_20220609_02_T1 | 2022 | Train |
| LC08_L1TP_120031_20220516_20220519_02_T1 | 2022 | Train |
| LC08_L1TP_114027_20220826_20220924_02_T1 | 2022 | Train |
| LC08_L1TP_114027_20220810_20220818_02_T1 | 2022 | Train |
| LC08_L1TP_114027_20220607_20220610_02_T1 | 2022 | Train |
