# Supplementary material for: Long history paddy rice mapping across Northeast China with deep learning and annualresult enhancement method
Source: Copernicus journal article supplement (doi:10.5194/essd-17-6851-2025), 2025-12-05
Supplement: Supplementary file [file essd-17-6851-2025-supplement-title-page.pdf › essd-17-6851-2025-supplement-title-page.pdf]

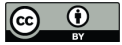

## *Supplement of*

# **Long history paddy rice mapping across Northeast China with deep learning and annual result enhancement method**

**Zihui Zhang et al.**

*Correspondence to:* Lang Xia (xialang@caas.cn), Fen Zhao (zhaofen@caas.cn), and Peng Yang (yangpeng@caas.cn)

- [essd-17-6851-2025-supplement-title-page.pdf](#)
- [Table S1.docx](#)

The copyright of individual parts of the supplement might differ from the article licence.
